# Supplementary material for: TILLING by Sequencing: A Successful Approach to Identify Rare Alleles in Soybean Populations
Source: MDPI journal article supplement (doi:10.3390/genes10121003), 2019-12-03
Supplement: s1 [file s1]

Figure 2.

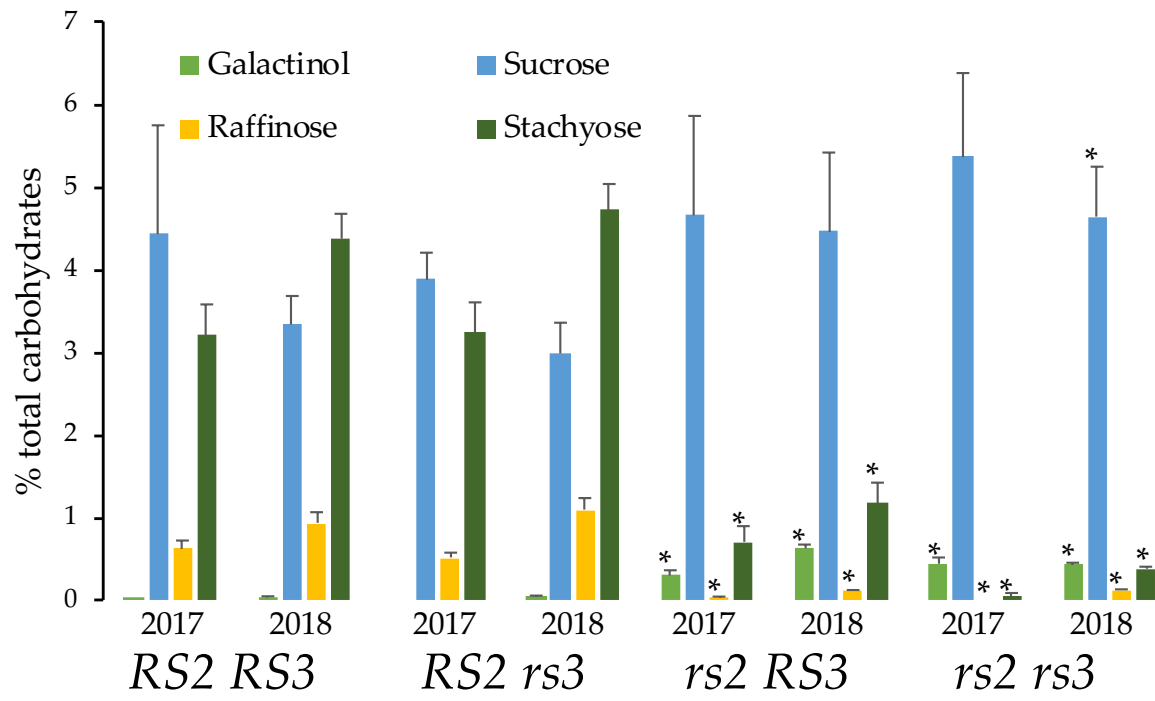

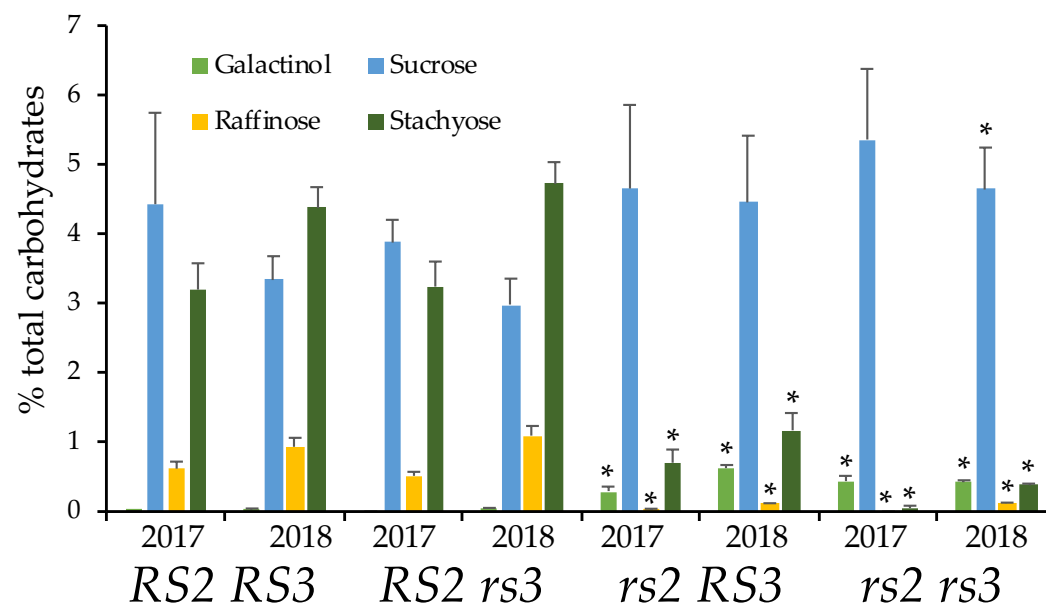

Figure S2.

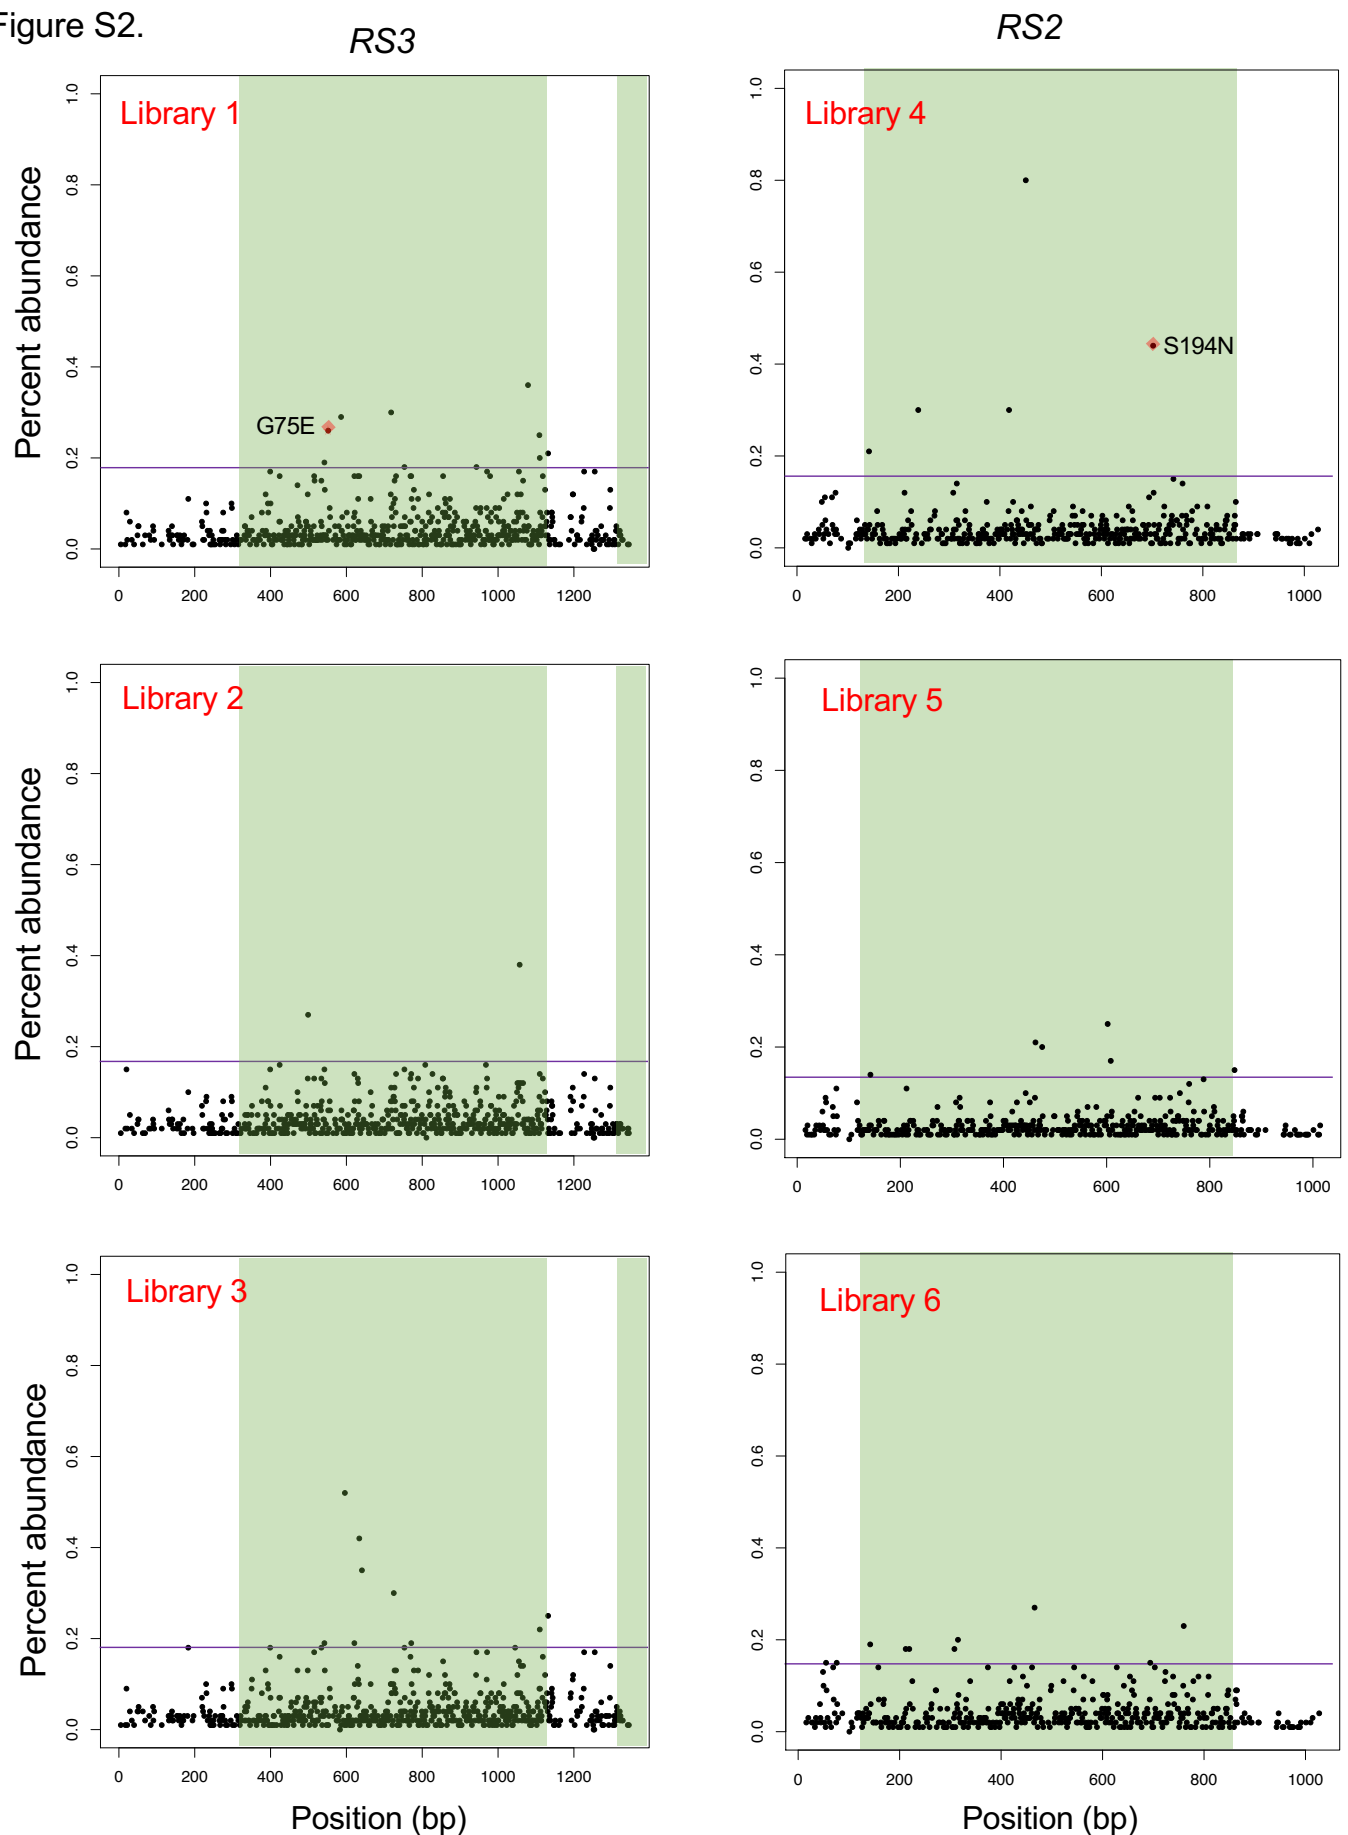

Figure S1. Polymorphisms in the RS2 and RS3 amplicon sequences

Abundance of G to A and C to T polymorphisms in RS2 and RS3 amplicon sequence in each of three libraries. Green shaded region indicates exon sequence, horizontal line marks a frequency of 0.15 selected as threshold. Highlighted are two validated sequence polymorphisms. Polymorphisms from PI200508 not shown, as these were not G to A or C to T changes.

Figure S3.

**RS2 – L180P**

Pool PCR:

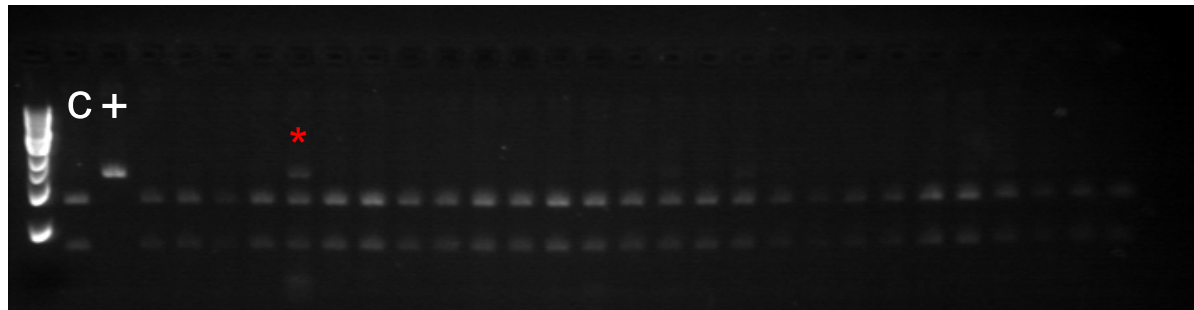

Individual PCR:

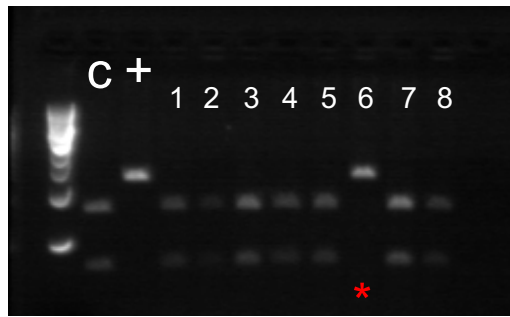

**RS2 – S194N**

Pool PCR:

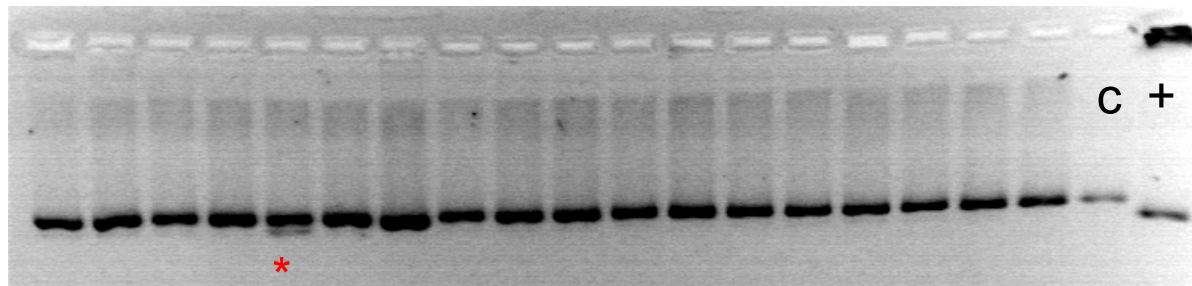

Individual PCR:

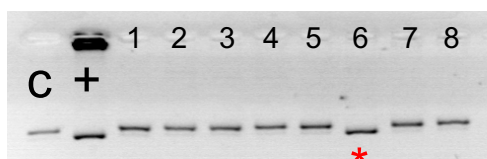

Figure S3. Detection of *RS2* polymorphisms  
Pool and subpool PCR showing the appearance of  
both the L180P and S194N polymorphisms in a single  
plant sample (plant #6 in pool 5).
