# Supplementary material for: TILLING by Sequencing: A Successful Approach to Identify Rare Alleles in Soybean Populations
Source: MDPI journal article supplement (doi:10.3390/genes10121003), 2019-12-03
Supplement: s1 [file s1]

Figure S3.

**RS2 – L180P**

Pool PCR:

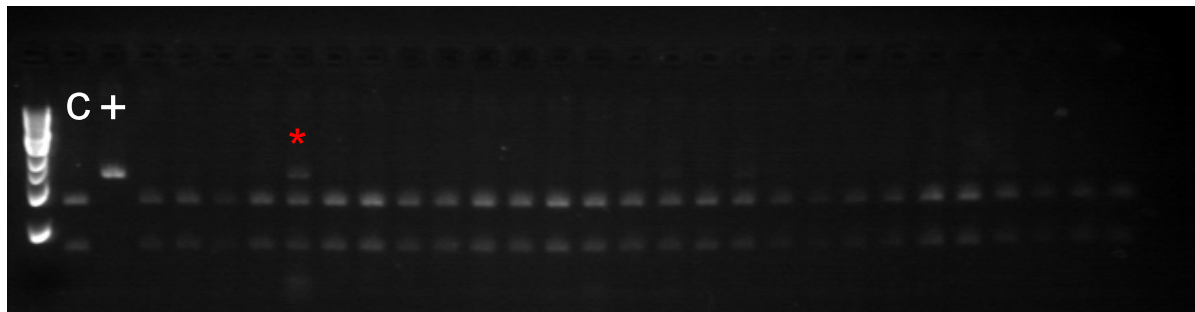

Individual PCR:

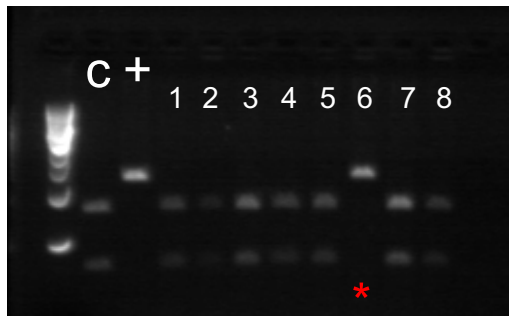

**RS2 – S194N**

Pool PCR:

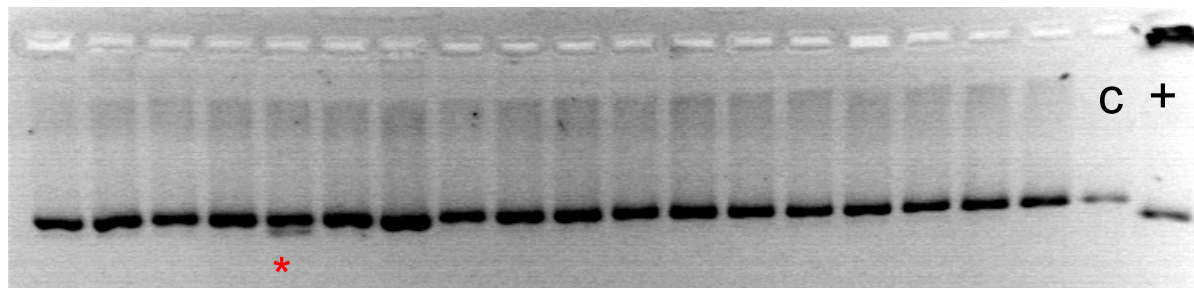

Individual PCR:

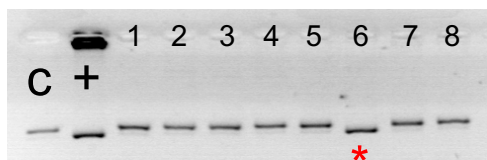

Figure S3. Detection of *RS2* polymorphisms  
Pool and subpool PCR showing the appearance of both the L180P and S194N polymorphisms in a single plant sample (plant #6 in pool 5).
