# Supplementary material for: TILLING by Sequencing: A Successful Approach to Identify Rare Alleles in Soybean Populations
Source: MDPI journal article supplement (doi:10.3390/genes10121003), 2019-12-03
Supplement: s1 [file s1]

Figure S1. Depth of coverage

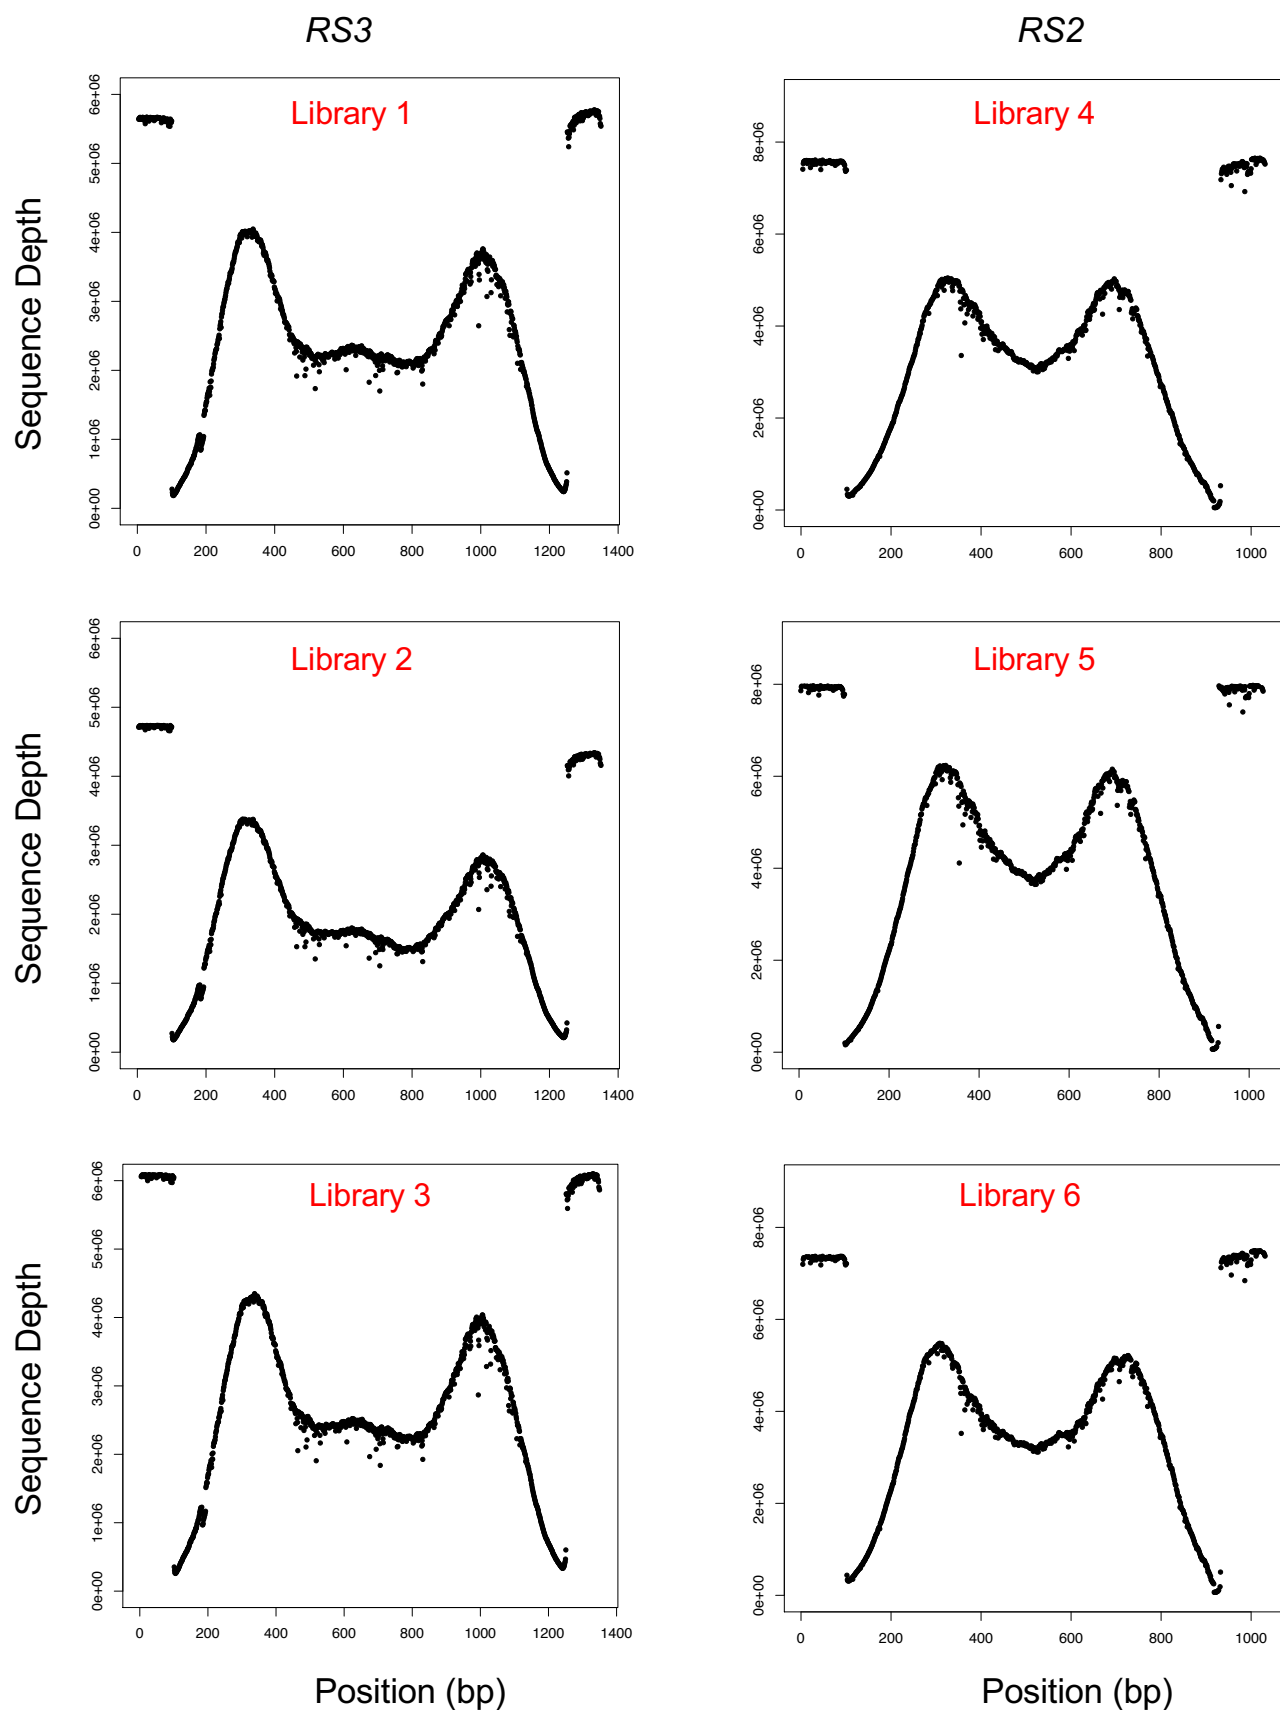

Figure S1. Sequence depth over the *RS2* and *RS3* exon 1 amplicons. Small gap in *RS3* sequence at ~ 200bp into the amplicon is a small inverted repeat that occurs approximately 300bp upstream of the translation start site.
